# Supplementary material
Source: ML conference proceedings conference paper supplement (https://proceedings.neurips.cc/paper_files/paper/2012/hash/8e98d81f8217304975ccb23337bb5761-Abstract.html)
Supplement: Supplementary file 1 [file 8e98d81f8217304975ccb23337bb5761-Supplemental.zip]

# Semi-Supervised Domain Adaptation with Non-Parametric Copulas

D. Lopez-Paz<sup>1</sup>, J. M. Hernández-Lobato<sup>2</sup>, B. Schölkopf<sup>1</sup>

Poster TU11, NIPS 2012, Lake Tahoe

---

<sup>1</sup>Max Planck Institute for Intelligent Systems

<sup>2</sup>Cambridge University

# Marginal Distributions for the Wine Quality Problem

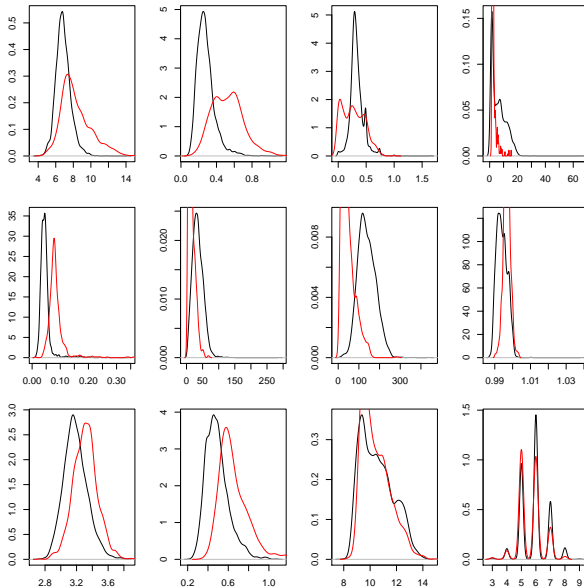

# Some Pair-wise Interactions for the Wine Quality Problem

Interaction between `residual_sugar` and `density`:

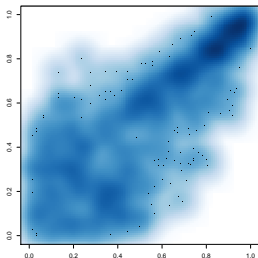

White Wine

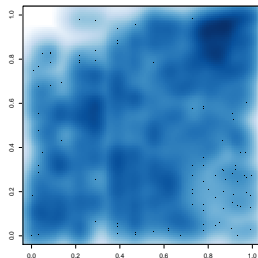

Red Wine

This plotted interactions are formally called copulas.

# Vine Distributions for Domain Adaptation

$$p(\mathbf{x}) = \prod_{i=1}^d p_i(x_i) \prod_{i=1}^{d-1} \prod_{e(j,k) \in E_i} c_{jk|D(e)}(P_{j|D(e)}(x_{j|D(e)}), P_{k|D(e)}(x_{k|D(e)}))$$

This models allow to:

- 1 Independently **explore changes** in each factor accross domains.
- 2 Use unlabeled data to improve the estimation of the factors that do not depend on the target variable.

In this work, we propose the **non-parametric regular vine distribution**.

| Dataset          | Wine               | Sarcos             | Rocks-Mines        | Hill-Valleys       | Axis-Slice         | Isolet             |
|------------------|--------------------|--------------------|--------------------|--------------------|--------------------|--------------------|
| No. of variables | 12                 | 21                 | 60                 | 100                | 386                | 617                |
| GP-Source        | 0.86 ± 0.02        | 1.80 ± 0.04        | 0.90 ± 0.01        | 1.00 ± 0.00        | 1.52 ± 0.02        | 1.59 ± 0.02        |
| GP-All           | 0.83 ± 0.03        | 1.69 ± 0.04        | 1.10 ± 0.08        | 0.87 ± 0.06        | 1.27 ± 0.07        | 1.58 ± 0.02        |
| Daume            | 0.97 ± 0.03        | 0.88 ± 0.02        | 0.72 ± 0.09        | 0.99 ± 0.03        | 0.95 ± 0.02        | 0.99 ± 0.00        |
| SSL-Daume        | 0.82 ± 0.05        | 0.74 ± 0.08        | 0.59 ± 0.07        | 0.82 ± 0.07        | 0.65 ± 0.04        | 0.64 ± 0.02        |
| ATGP             | 0.86 ± 0.08        | 0.79 ± 0.07        | <b>0.56 ± 0.10</b> | 0.15 ± 0.07        | 1.00 ± 0.01        | 1.00 ± 0.00        |
| KMM              | 1.03 ± 0.01        | 1.00 ± 0.00        | 1.00 ± 0.00        | 1.00 ± 0.00        | 1.00 ± 0.00        | 1.00 ± 0.00        |
| KuLSIF           | 0.91 ± 0.08        | 1.67 ± 0.06        | 0.65 ± 0.10        | 0.80 ± 0.11        | 0.98 ± 0.07        | 0.58 ± 0.02        |
| NPRV             | <b>0.73 ± 0.07</b> | <b>0.61 ± 0.10</b> | 0.72 ± 0.13        | <b>0.15 ± 0.07</b> | 0.38 ± 0.07        | 0.46 ± 0.09        |
| UNPRV            | 0.76 ± 0.06        | 0.62 ± 0.13        | 0.72 ± 0.15        | 0.19 ± 0.09        | <b>0.37 ± 0.07</b> | <b>0.42 ± 0.04</b> |
